# Supplementary material
Source: Research Square preprint supplement (doi:10.21203/rs.3.rs-8964579/v1)
Supplement: Supplementary file 1 [file 10def0948b42d2638caca9db.docx]

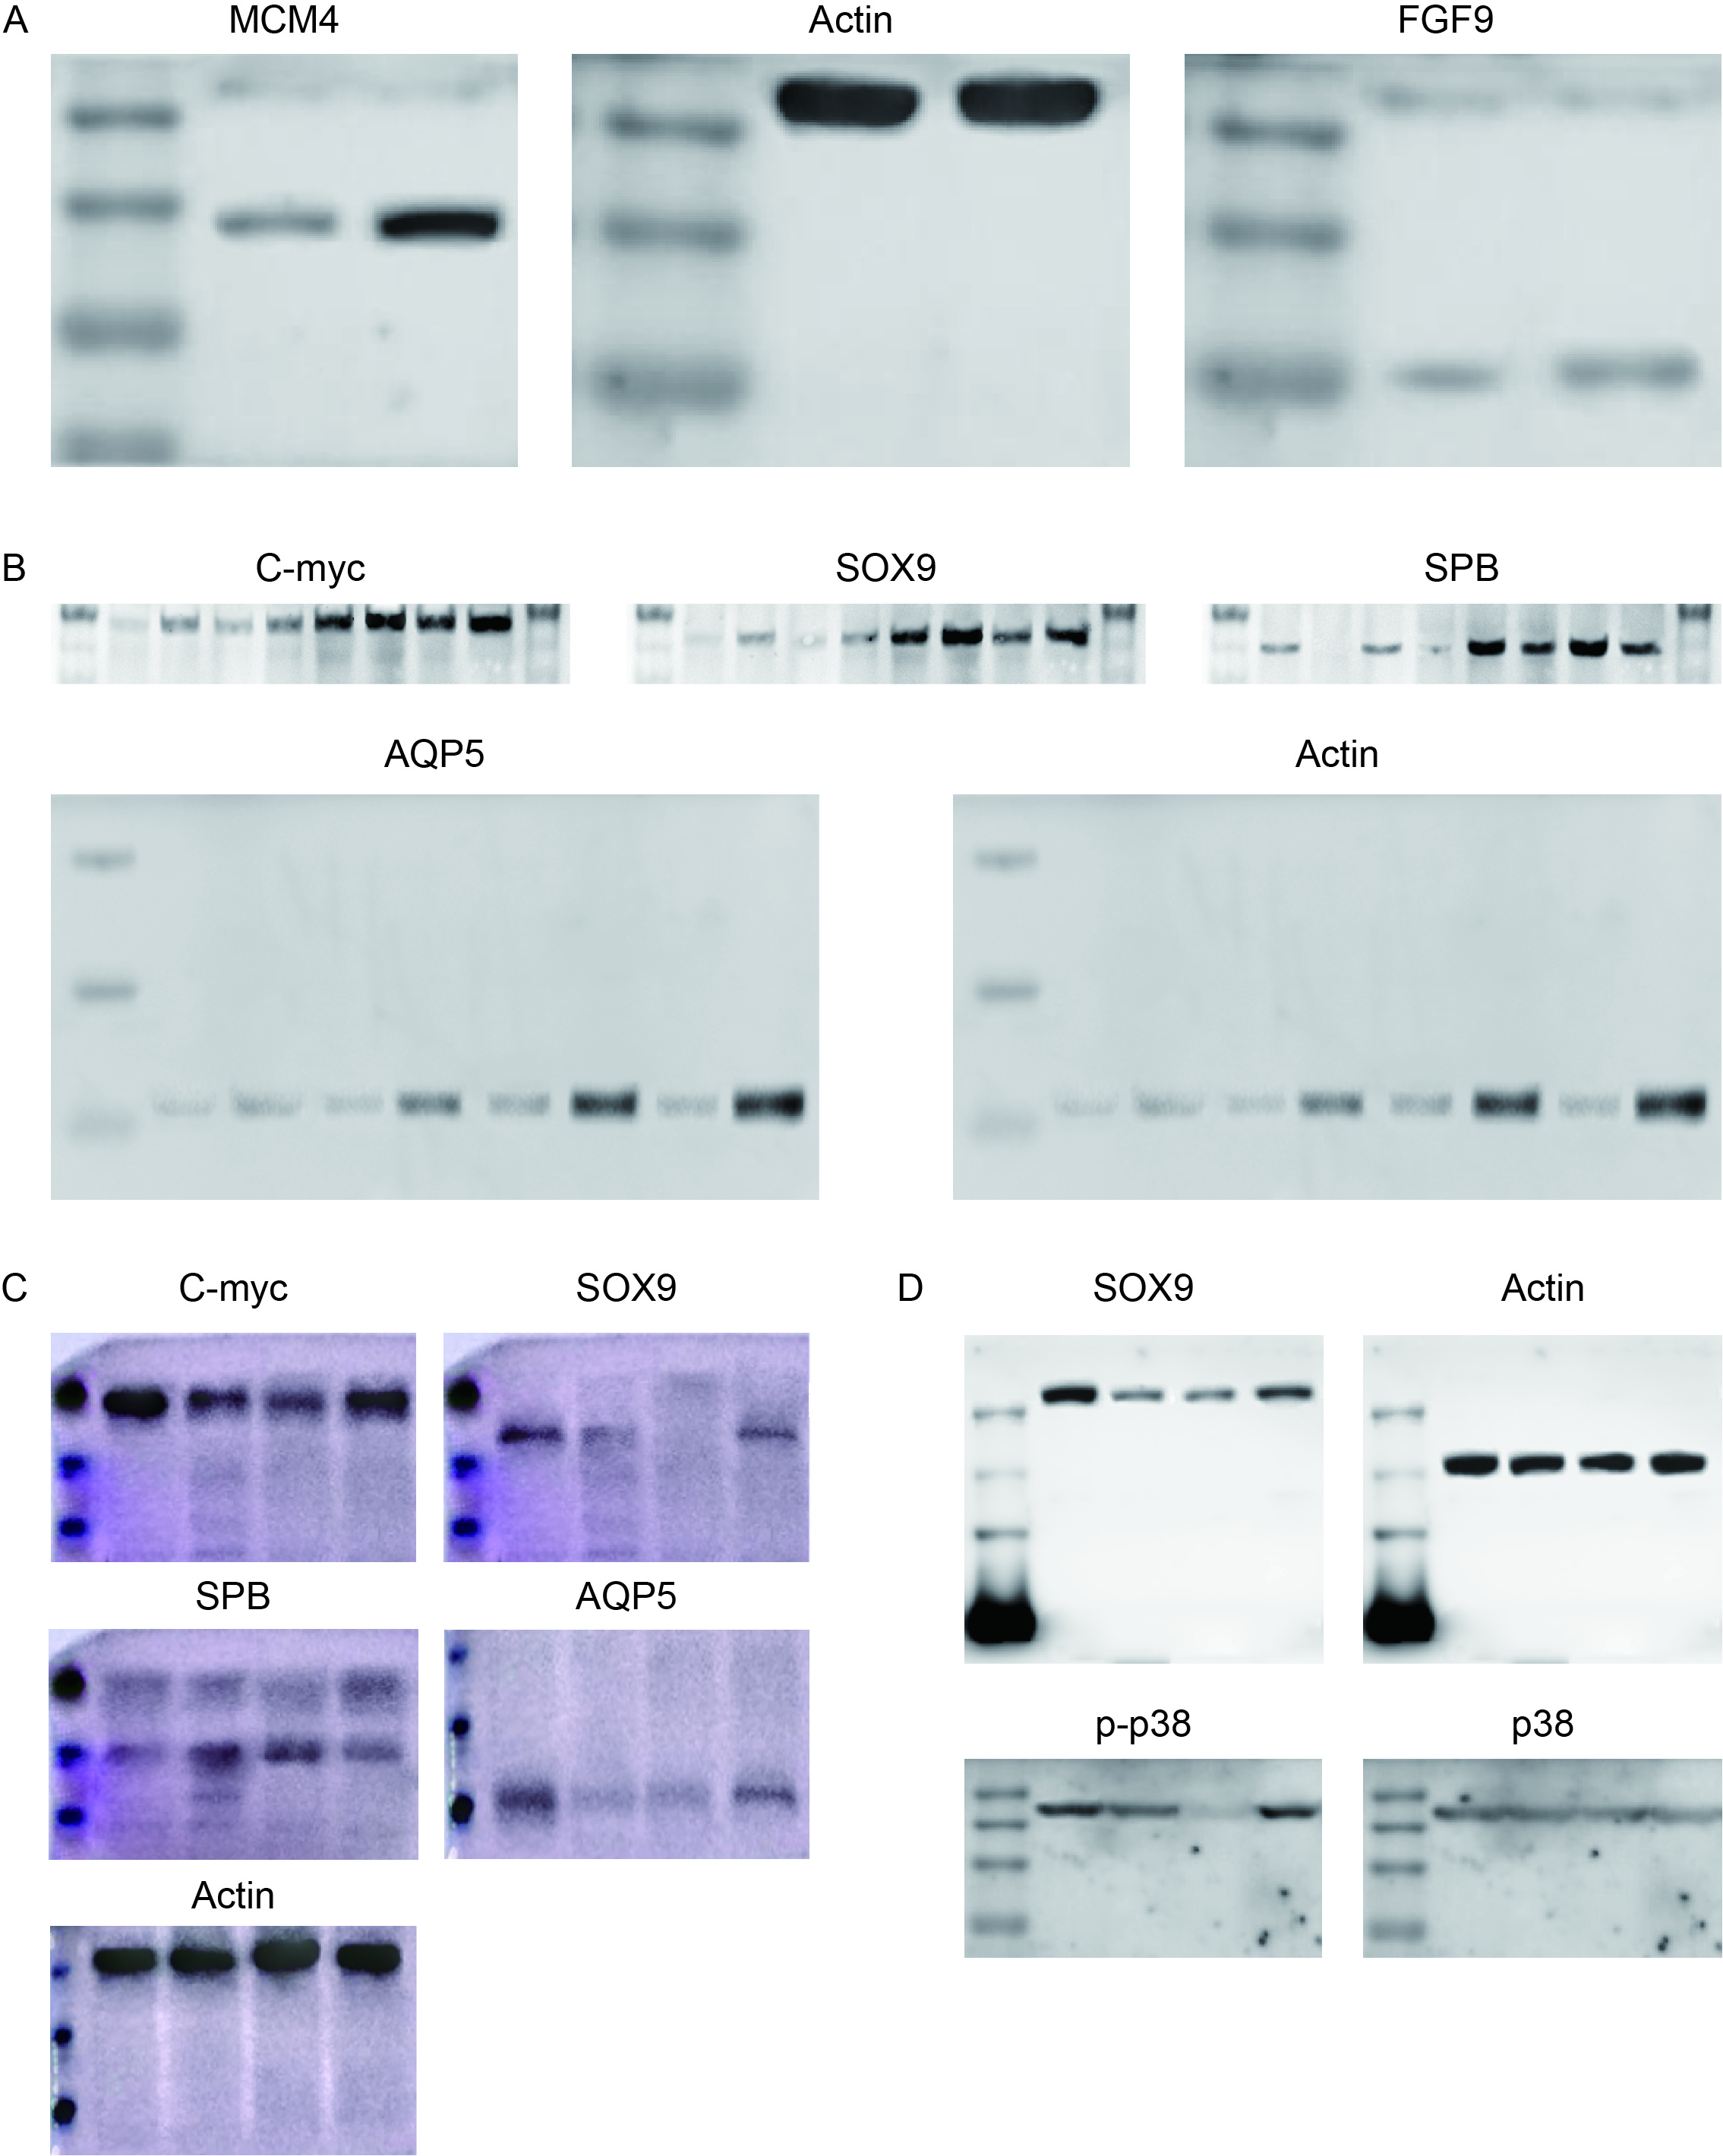
**Supplementary Figure 1.** The full uncropped blots images for: (A) FIgure 2D; (B) Figure 2G; (C) Figure 3F (Left 2) and Figure 4D (Right 2); (D) Figure 4I
